# Supplementary material
Source: MDPI journal article supplement (https://www.mdpi.com/2071-1050/15/23/16321)
Supplement: s1 [file s1]

# Sustainable CO<sub>2</sub> Fixation onto Bio-Based Aromatics

Aleksa Kojčinović<sup>1,2</sup>, Blaž Likozar<sup>1,3,4,\*</sup> and Miha Grilc<sup>1,2,3,\*</sup>

<sup>1</sup> Department of Catalysis and Chemical Reaction Engineering, National Institute of Chemistry, Hajdrihova 19, 1000 Ljubljana, Slovenia; aleksa.kojcinovic@ki.si

<sup>2</sup> Graduate School, University of Nova Gorica, Vipavska Cesta 13, 5000 Nova Gorica, Slovenia

<sup>3</sup> Pulp and Paper Institute, Bogišičeva 8, 1000 Ljubljana, Slovenia

<sup>4</sup> Faculty of Polymer Technology, Ozare 19, 2380 Slovenj Gradec, Slovenia

\* Correspondence: blaz.likozar@ki.si (B.L.); miha.grilc@ki.si (M.G.);

Tel.: +386-1-4760-281 (B.L.); Fax: +386-1-4760-300 (B.L.)

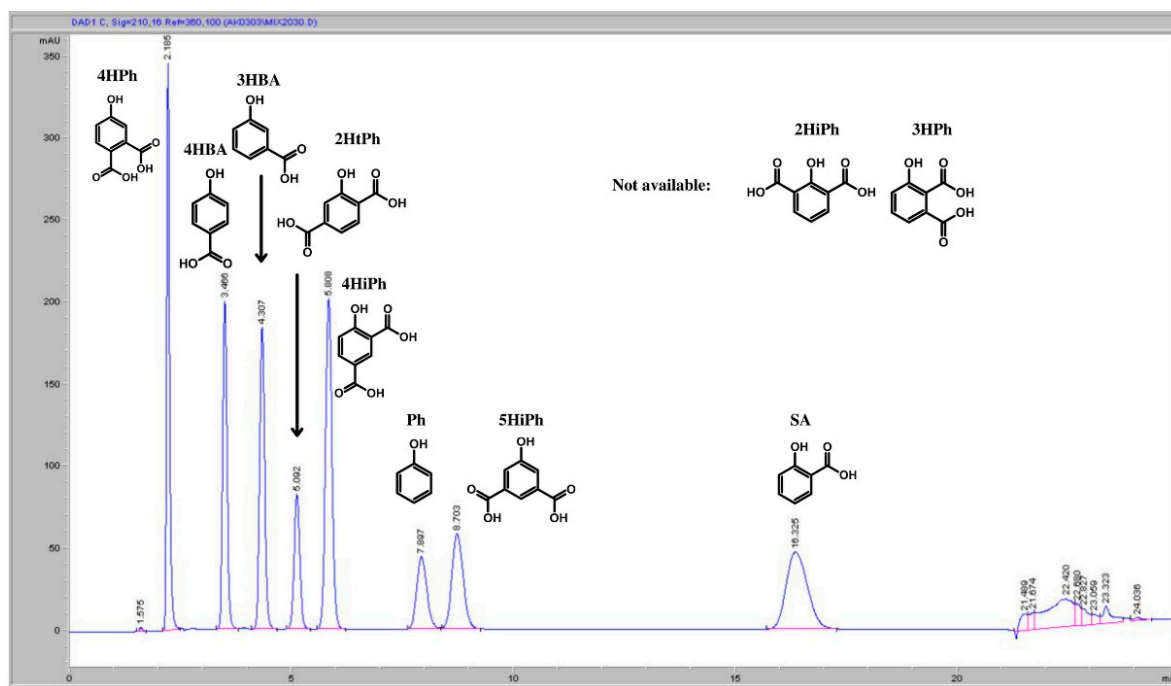

**Figure S1.** HPLC chromatogram showing great separation of potential mono- and dicarboxylated phenols.

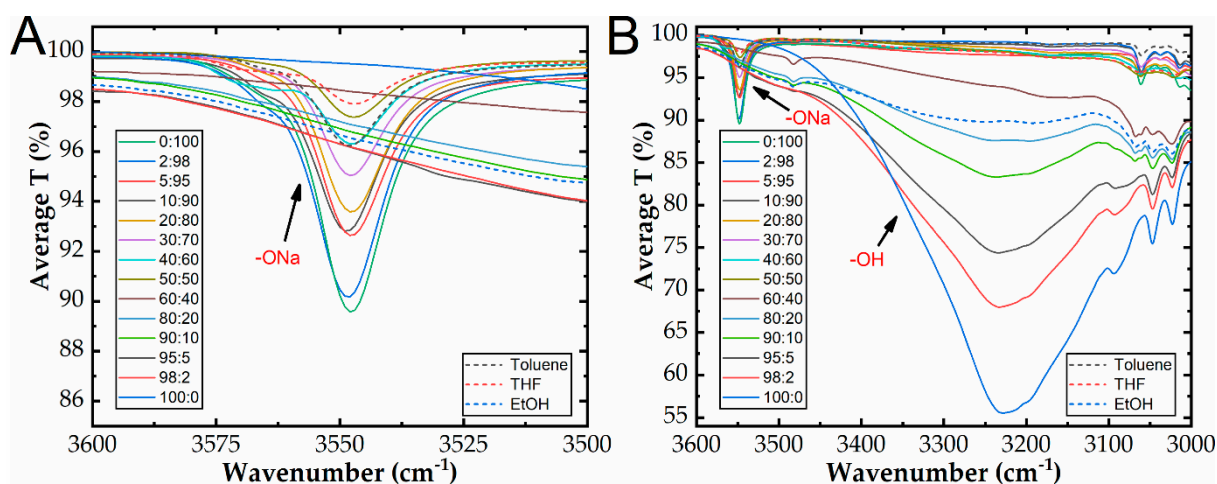

**Figure S2.** FTIR spectra of sodium phenoxides obtained when using three different solvents (toluene, tetrahydrofuran (THF), and ethanol (EtOH)) and compared to the calibration curve of various ratios of Ph:NaOPh, Figure S2A is showing characteristic –ONa peak, while Figure S2B also includes the –OH peak.

**Table S1.** Calculation of margin of error obtained with results from various methods (reflux, open beaker, and Marasse methods) of sodium phenoxide preparation.

|             |                                 | Results, Yields of SA        | N | Mean, $\bar{x}$ | Standard Deviation, $s$ | Margin of Error     |
|-------------|---------------------------------|------------------------------|---|-----------------|-------------------------|---------------------|
| Reflux      | NaOH                            | 41.1, 35.2, 28.9, 30.2, 34.1 | 5 | 33.9            | 4.8                     | 33.9 ±4.2 (±12.4%)  |
|             | KOH                             | 39.2, 44.1, 34.1, 38.1, 44.1 | 5 | 39.9            | 4.3                     | 39.9 ±3.7 (±9.4%)   |
|             | Na <sub>2</sub> CO <sub>3</sub> | 15.1, 13.2, 28.1, 26.5, 24.6 | 5 | 21.5            | 6.9                     | 21.5 ±6.0 (±28.0%)  |
| Open beaker | NaOH                            | 6.5 23.1                     | 2 | 14.8            | 11.7                    | 14.8±16.3 (±109.9%) |
|             | KOH                             | 30.1 15.2                    | 2 | 22.65           | 10.5                    | 22.65±14.6 (±64.5%) |
|             | Na <sub>2</sub> CO <sub>3</sub> | 12.7 3.2                     | 2 | 7.95            | 6.7                     | 8.0±9.3 (±117.1%)   |
| Marasse     | K <sub>2</sub> CO <sub>3</sub>  | 27.5, 31.5, 27.7, 23.5, 27.2 | 5 | 27.5            | 2.8                     | 27.5 ±2.5 (±9.0%)   |

Where the standard deviation  $s$  was calculated with the formula below:

$$s = \sqrt{\frac{1}{N-1} \sum_{i=1}^N (x - \bar{x})^2}$$
